# Supplementary material for: Microstructure, micro-inclusions, and mineralogy along the EGRIP (East Greenland Ice Core Project) ice core – Part 2: Implications for palaeo-mineralogy
Source: Copernicus journal article supplement (doi:10.5194/tc-16-667-2022), 2022-02-23

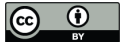

*Supplement of*

**Microstructure, micro-inclusions, and mineralogy along the EGRIP  
(East Greenland Ice Core Project) ice core – Part 2:  
Implications for palaeo-mineralogy**

**Nicolas Stoll et al.**

*Correspondence to:* Nicolas Stoll ([nicolas.stoll@awi.de](mailto:nicolas.stoll@awi.de))

The copyright of individual parts of the supplement might differ from the article licence.

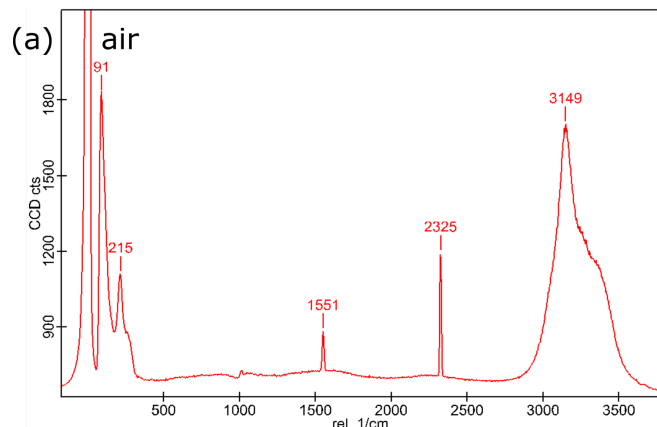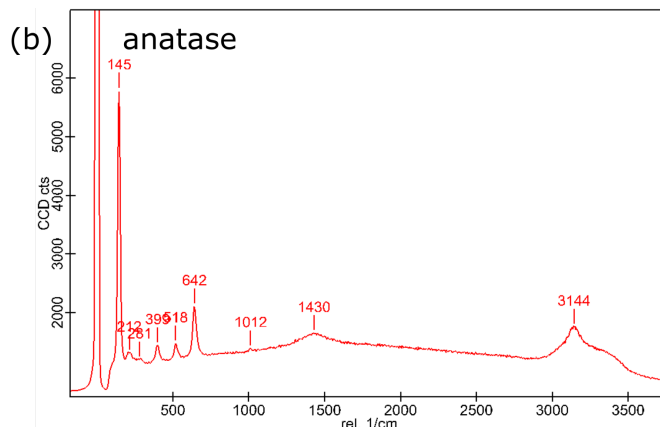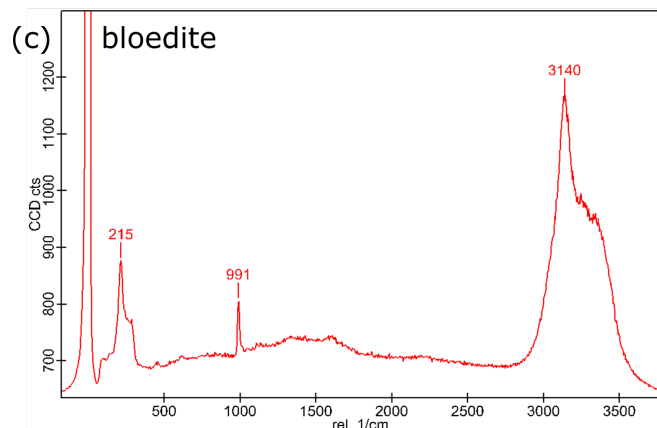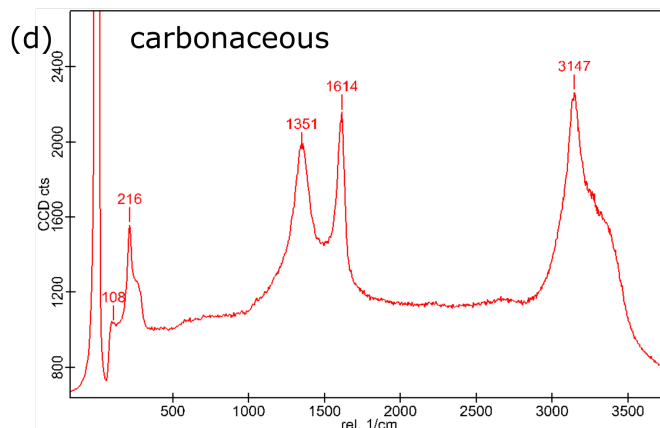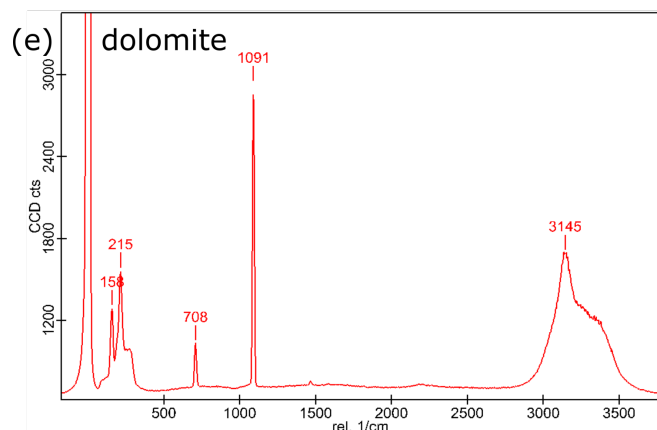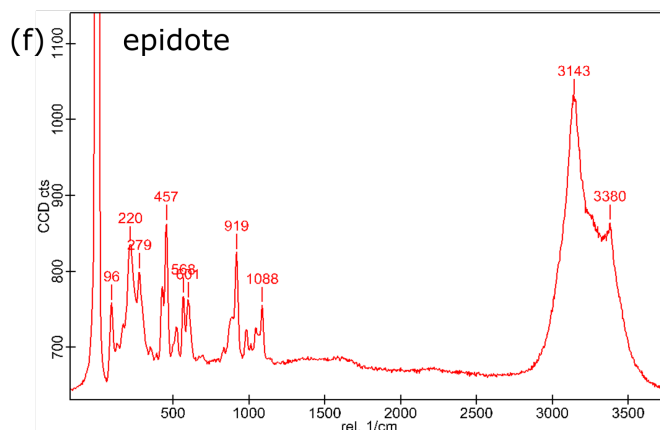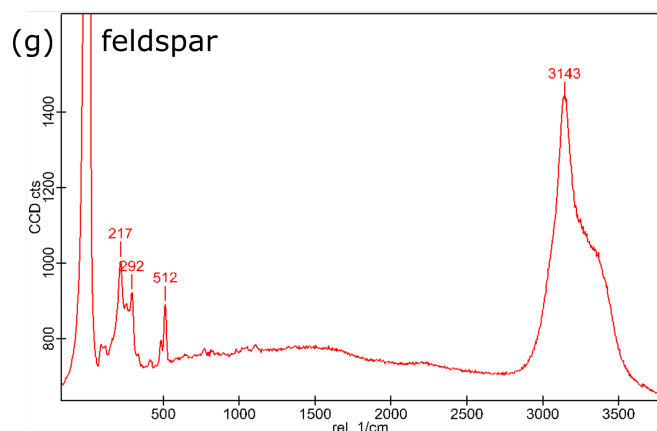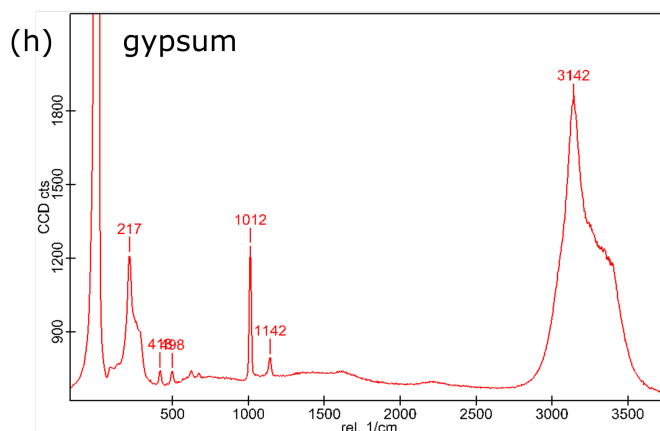

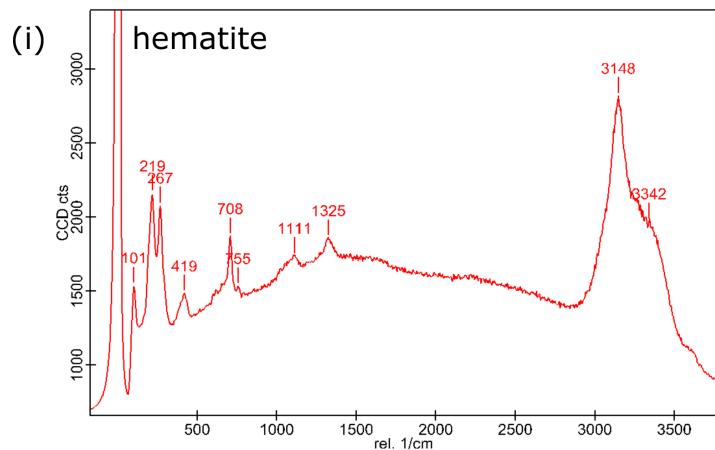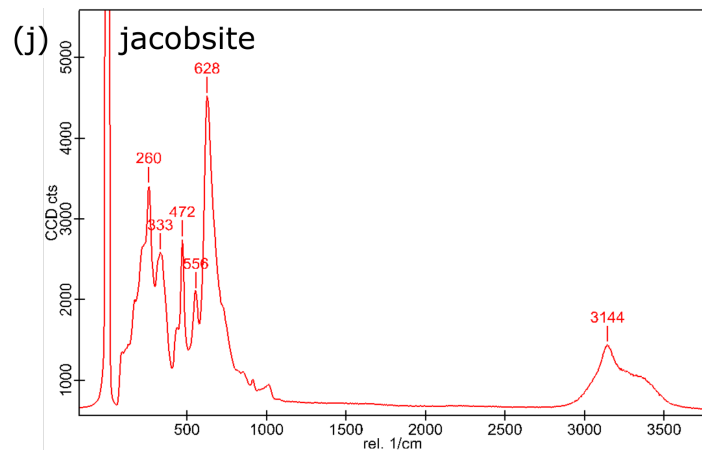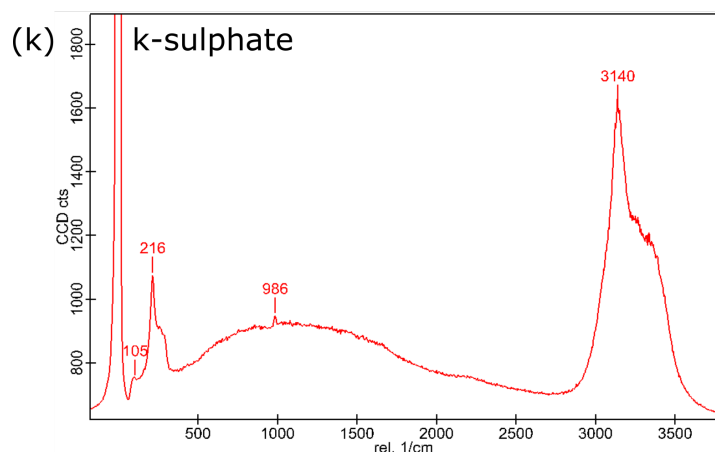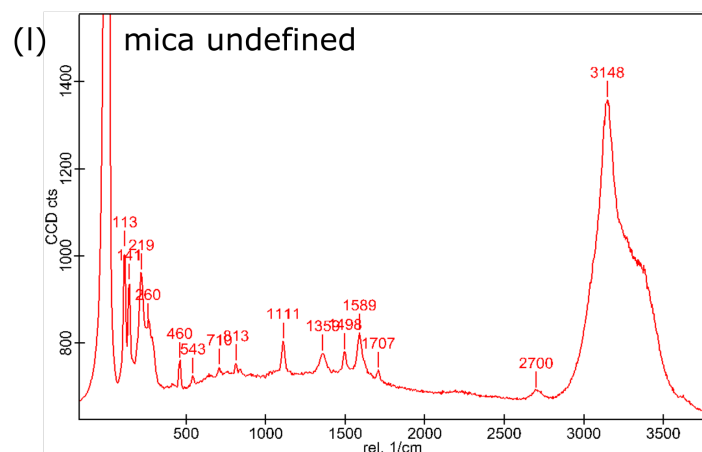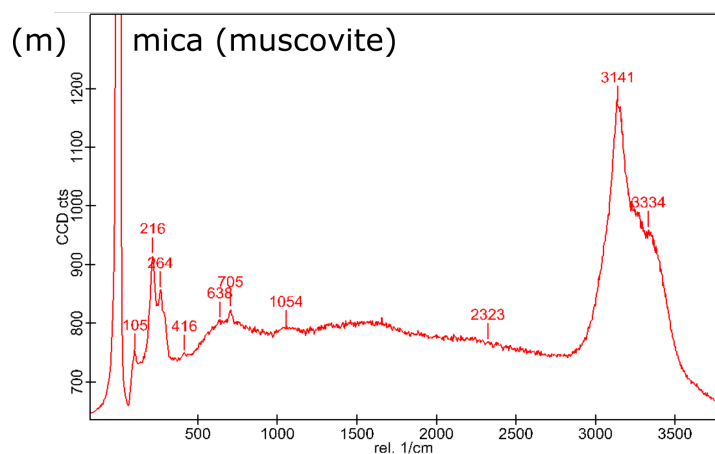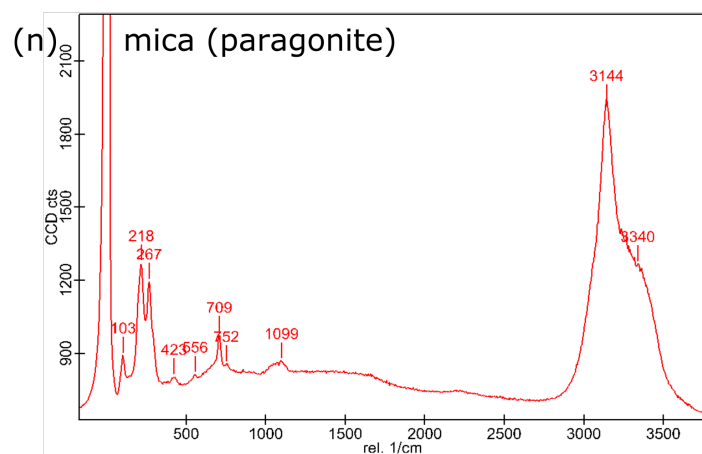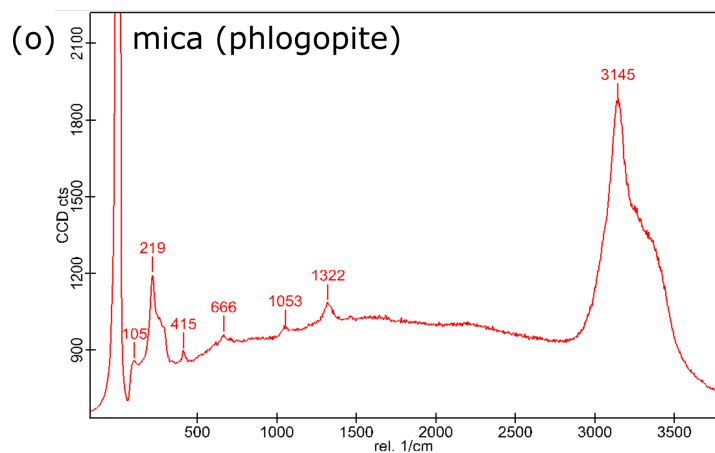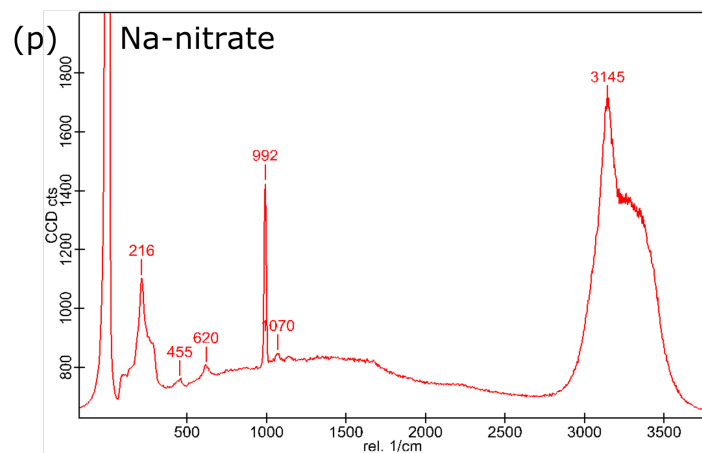

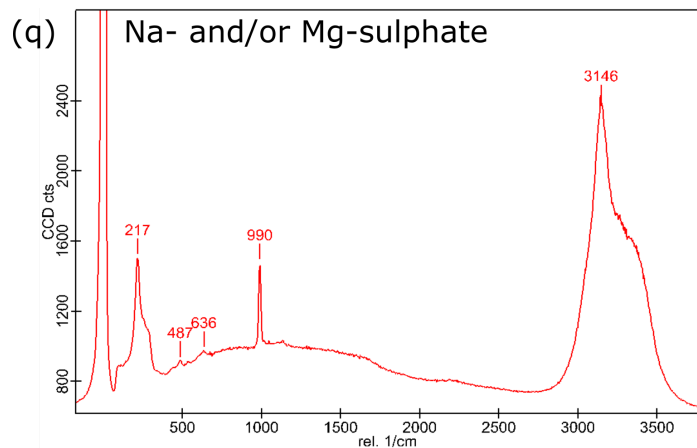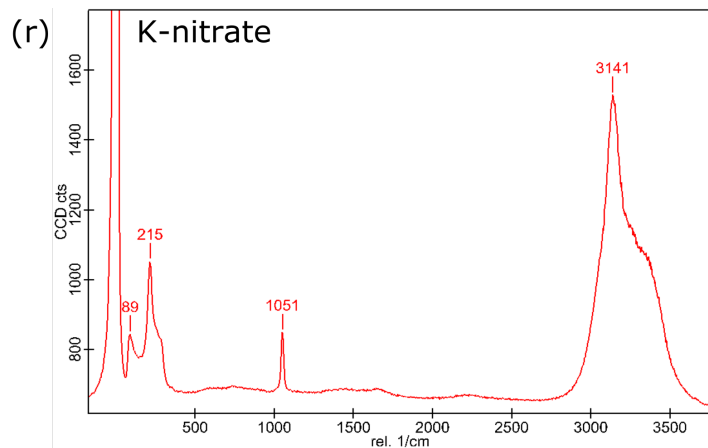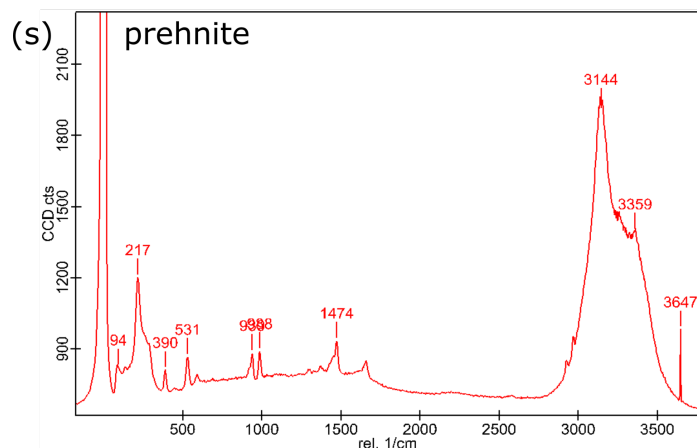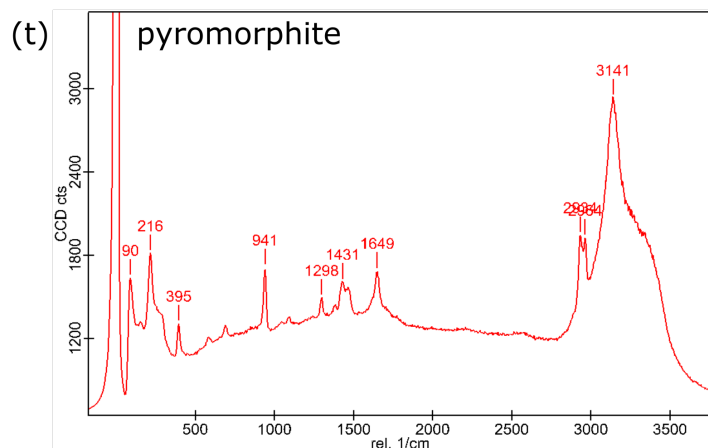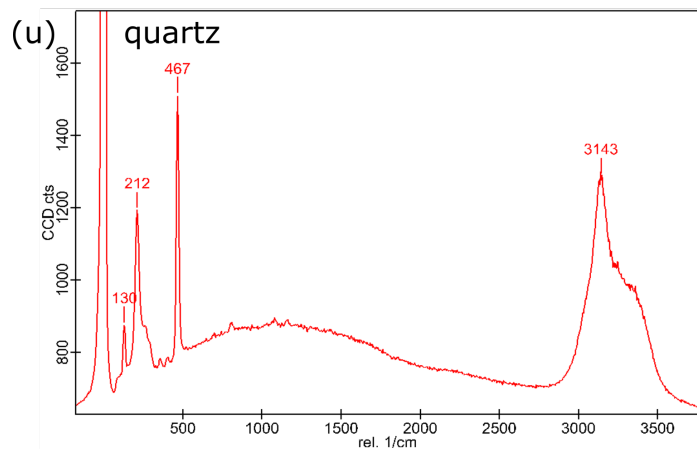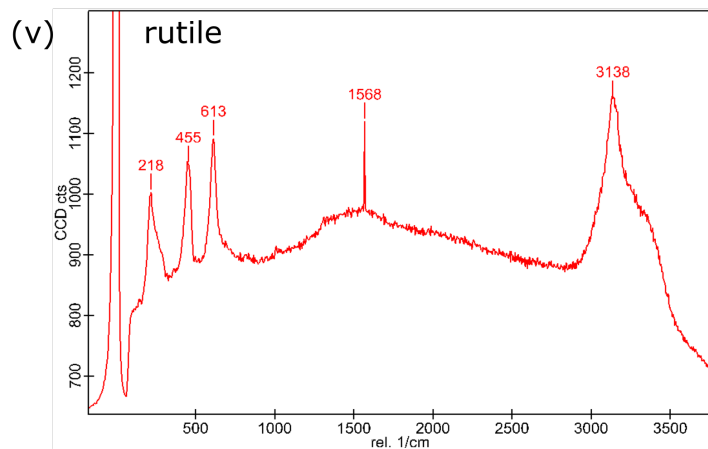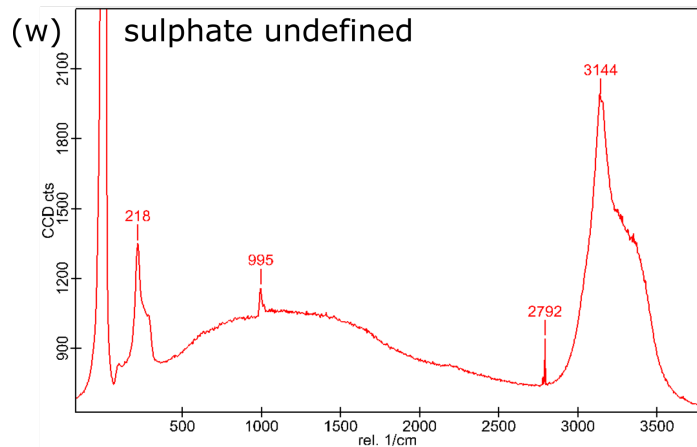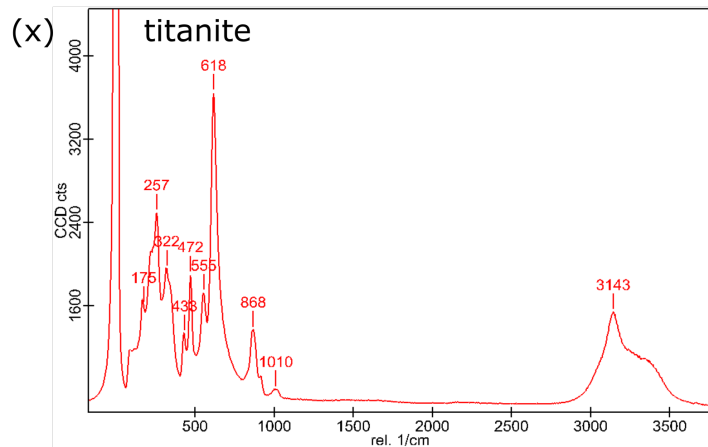

Supplement: Supplementary file 1 [file tc-16-667-2022-supplement.pdf]
